1 A multidrug resistant clinical *P. aeruginosa* isolate in the MLST550 clonal complex:  
2 uncoupled quorum sensing modulates the interplay of virulence and resistance

3 Huiluo Cao<sup>a</sup>, Tingying Xia<sup>a§</sup>, Yanran Li<sup>a§</sup>, Zeling Xu<sup>a§</sup>, Salim Bougouffa<sup>b</sup>, Yat Kei Lo<sup>a</sup>, Vladimir  
4 B. Bajic<sup>b</sup>, Haiwei Luo<sup>c</sup>, Patrick C.Y. Woo<sup>d</sup>, Aixin Yan<sup>a\*</sup>

5 <sup>a</sup> School of Biological Sciences, The University of Hong Kong, Pokfulam Road, Hong Kong  
6 SAR, China

7 <sup>b</sup> Computational Bioscience Research Center (CBRC), King Abdullah University of Science and  
8 Technology (KAUST), Thuwal, Saudi Arabia

9 <sup>c</sup> School of Life Sciences, The Chinese University of Hong Kong, Sha Tin, Hong Kong SAR,  
10 China

11 <sup>d</sup> Department of Microbiology, Li Ka Shing Faculty of Medicine, The University of Hong Kong,  
12 Hong Kong SAR, China

13 §: These authors contributed equally

14

15 Running title: Uncoupled QS modulates virulence in MDR *P. aeruginosa*

16

17 \*Correspondence:

18 Dr. Aixin Yan,

19 School of Biological Sciences, The University of Hong Kong

20 Email: [ayan8@hku.hk](mailto:ayan8@hku.hk); Tel: (852) 22990864; Fax: (852) 25599114

21 **Abstract**

22

23 *Pseudomonas aeruginosa* is a prevalent and pernicious pathogen equipped with both extraordinary  
24 capabilities to infect the host and to develop antimicrobials resistance (AMR). Monitoring the  
25 emergence of AMR high risk clones and understanding the interplay of their pathogenicity and  
26 antibiotic resistance is of paramount importance to avoid resistance dissemination and to control  
27 *P. aeruginosa* infections. In this study, we report the identification of a multidrug resistant (MDR)  
28 *P. aeruginosa* strain PA154197 isolated from a blood stream infection in Hong Kong. PA154197  
29 belongs to a distinctive MLST550 clonal complex shared by two international *P. aeruginosa*  
30 isolates VW0289 and AUS544. Comparative genome and transcriptome analysis with the  
31 reference strain PAO1 led to the identification of a variety of genetic variations in antibiotic  
32 resistance genes and the hyper-expression of three multidrug efflux pumps MexAB-OprM,  
33 MexEF-OprN, and MexGHI-OpmD in PA154197. Unlike many resistant isolates displaying an  
34 attenuated virulence, PA154197 produces a significantly high level of the *P. aeruginosa* major  
35 virulence factor pyocyanin (PYO) and displays an uncompromised virulence compared to PAO1.  
36 Further analysis revealed that the secondary quorum sensing system Pqs which primarily controls  
37 the PYO production is hyper-active in PA154197 independent of the master QS systems Las and  
38 Rhl. Together, these investigations disclose a unique, uncoupled QS mediated pathoadaptation  
39 mechanism in clinical *P. aeruginosa* which may account for the high pathogenic potentials and  
40 antibiotics resistance in the MDR isolate PA154197.

## 41 **Introduction**

42 *Pseudomonas aeruginosa* is a ubiquitous Gram-negative pathogen that causes a variety of  
43 notorious infections in humans such as ventilator-associated pneumonia, lung infections of cystic  
44 fibrosis (CF) patients, burn wound infection, and various sepsis syndromes. It is the second leading  
45 cause of hospital-acquired infections and is especially problematic in ICUs, where it is the leading  
46 cause of pneumonia among pediatric patients and is responsible for a large number of urinary tract  
47 (10% in US and 19% in Europe), blood stream (3% in US and 10% in Europe), eye, ear, nose, and  
48 throat infections (1-3). Compounding the burden of these infections is the extraordinary capability  
49 of the pathogen to develop antibiotic and multidrug resistance (MDR) even during the course of  
50 antibiotics therapy. *P. aeruginosa* is one of the “ESKAPE” (*Enterococcus spp.*, *Staphylococcus*  
51 *aureus*, *Klebsiella spp.*, *Acinetobacter baumannii*, *Pseudomonas aeruginosa*, and *Enterobacter*  
52 *spp.*) organisms which are recognized by the WHO as an alarming threat to the global public health  
53 associated with antimicrobial resistance (AMR). As a consequence, the diseases outcome of the *P.*  
54 *aeruginosa* infections is the complex interplay of the pathogen (its pathogenicity and virulence),  
55 hospital environments (antibiotic therapies and the emergence of AMR), and the patient’s  
56 conditions (host immune responses) (4-6).

57  
58 *P. aeruginosa* is genetically equipped with outstanding intrinsic antibiotic resistance machineries.  
59 These include the inducible production of the AmpC cephalosporinase, presence of the  
60 housekeeping MexAB-OprM multidrug efflux pump, and the limited permeability of its outer  
61 membrane caused by low expression and inefficient porin proteins (4, 7, 8). In addition, the  
62 pathogen has extraordinary capabilities of developing acquired antibiotic resistance. Mutational  
63 overexpression of one of at least four efflux pumps, MexAB-OprM, MexCD-OprJ, MexEF-OprN,

64 and MexXY-OprM, encoded in the genome of *P. aeruginosa* often plays an important role in  
65 acquired resistance and can lead to clinically significant MDR (9, 10). Among them, the MexAB-  
66 OprM pump displays the broadest substrates profile and mutational overexpression of this pump  
67 can lead to resistance to all  $\beta$ -lactams (except imipenem), (fluoro)quinolones, tetracyclines, and  
68 macrolides in clinics. Similar to the MexAB-OprM pump, overexpression of MexXY is frequent  
69 (10-30%) among clinical strains and causes decreased susceptibility to aminoglycosides and  
70 cefepime. Overexpression of MexEF-OprN and MexCD-OprJ is less frequent in clinical isolates  
71 (<5%) and they mainly affect fluoroquinolones resistance (5, 11). In addition to efflux pump  
72 overexpression mediated MDR, *P. aeruginosa* also readily develops resistance to specific class of  
73 antibiotics through genetic mutations and acquisition of target or drug inactivation genes. These  
74 include overexpression of *ampC* caused by mutations in peptidoglycan-recycling genes *ampD*,  
75 *dacB*, or *ampR* that causes resistance to noncarbapenem  $\beta$ -lactams; acquisition of aminoglycosides  
76 modification enzymes (AMEs) and ribosomal methyltransferase (Rmts) enzymes which are  
77 associated with aminoglycosides resistance; mutations in the DNA gyrase (*gyrA* and *gyrB*) and/or  
78 topoisomerase IV (*parC* and *parE*) which results in fluoroquinolone resistance, and mutational  
79 repression of the OprD porin which leads to resistance to imipenem (12-15).

80  
81 Regardless of the resistance mechanisms involved, the emergence and prevalence of MDR *P.*  
82 *aeruginosa* strains continue to rise rapidly world-wide. Although the bacterium displays an overall  
83 nonclonal epidemic population structure with most isolates represented by single MLST  
84 (multilocus sequence typing) genotypes, MDR or XDR (extensively drug-resistant) *P. aeruginosa*  
85 isolates display a much lower clonal diversity than the susceptible isolates and recent studies have  
86 reported the existence of MDR/XDR global clones disseminated in different hospitals world-wide

87 (11, 16, 17). Inter-patient spread of antibiotic resistant mutations linked to the transmission of  
88 epidemic CF strains is also reported. These clones are denominated as international high-risk  
89 clones. Among them, the most recognized successful clones are the high risk MDR clones ST111,  
90 ST175, and ST235, and the Liverpool Epidemic Strain (LES) ST146, which is the most epidemic  
91 clone among CF patients (11). Further deeper analysis of the molecular details of their resistance  
92 development and closely monitoring of the emerging of new international MDR/XDR high risk  
93 clones are of paramount importance to avoid the world-wide dissemination of these clones and to  
94 control *P. aeruginosa* infections.

95  
96 In addition to their broad and high level of antibiotic resistance, many MDR clones, especially the  
97 three major international high risk clones ST111, ST175, ST235, are found to be associated with  
98 a defined set of biological markers which include defective motility (swimming, swarming, and  
99 twitching), reduced pigment production (pyocyanin and pyoverdine), reduced in vitro fitness, but  
100 enhanced biofilm formation (5, 11). These suggest the presence of a fitness trade-off that  
101 compromises the pathogenic potentials and virulence of MDR isolates. Several epidemiological  
102 survey and molecular evolutionary studies ascribed these phenotypes to quorum sensing (QS)  
103 deficiency in these strains (18-21), which is not unexpected since production of many virulence  
104 factors, such as exo-proteases, elastase, rhamnolipids, lectin, pyoverdine, pyocyanin, hydrogen  
105 cyanide etc. are primarily regulated by QS systems in *P. aeruginosa*(1). On the other hand, recent  
106 studies also reported antibiotic resistant strains displaying enhanced virulence (17, 22-24), such as  
107 *P. aeruginosa* strains lacking the *oprD* porin (22), implying that certain MDR clones may develop  
108 compensatory mutations allowing them to recover their virulence without affecting the level of  
109 resistance.

110  
111 Recently, we surveyed 84 *P. aeruginosa* clinical strains isolated from various of infections  
112 including wound (both superficial and deep), urine, ear, pus, drain fluid, and blood in the Queen  
113 Mary Hospital, Hong Kong, and identified an MDR isolate PA154197 from a blood stream  
114 infection. PA154197 displays an MDR level and profile comparable to the international high-risk  
115 clone ST175. Sequencing its genome reveals that it belongs to a distinctive genotype MLST550  
116 rather than the ST175 clone. The MLST550 genotype is shared by two additional clinical strains  
117 in the database: VW0289 and AUS544 which were isolated from the sputum and bronchial lavage  
118 of CF patients in The Netherlands and Australia, respectively, suggesting a potential international  
119 transmission of this emerging clonal complex. This combined with the extraordinary antibiotic  
120 resistance profile of the strain prompt us to use PA154197 as a prototype to conduct comparative  
121 genomic and transcriptomic analysis and understand the resistance development and virulence of  
122 the MLST550. These studies led to the identification of the adaptive activation of the secondary  
123 quorum sensing system Pqs (*Pseudomonas* quinolone system) independent of the primary QS  
124 system Las and Rhl which may account for the uncompromised virulence in the MDR strain  
125 PA154197. Together, our studies report the emergence of a high-risk clone in clinics and its  
126 underlying pathoadaptation mechanism mediated by uncoupled QS.

127

## 128 **Results**

### 129 *PA154197 displays extraordinary antibiotic resistance*

130 We examined the susceptibility of PA154197 to various classes of antibiotics including the  
131 common antipseudomonal drugs aztreonam (ATM), imipenem (IPM), ciprofloxacin (CIP),  
132 levofloxacin (LVX), and amikacin (AMK) by measuring their MIC values and compared with that

133 for PAO1 (Fig. 1A). We found that PA154197 displays resistance to almost all these different  
134 classes of antibiotics with a 4-, 16-, 80-, and 160-fold decreases in susceptibility to the common  
135 antipseudomonal drugs ATM, IPM, CIP, and LVX, respectively, compared to PAO1. The only  
136 two antibiotics it remains susceptible are the aminoglycoside amikacin and the cyclic non-  
137 ribosomal polypeptides polymyxin B and E, which meets the XDR criteria (resistance to all but  
138 one or two of the eight classes of antipseudomonal drugs) according to Magiorakos et. al (16). To  
139 further evaluate its resistance level, we compared the antibiotics susceptibility profile of PA154197  
140 with the three international high-risk clones using the published data (25) and found that  
141 PA154197 displays a comparable resistance profile with the high-risk clone ST175 (Fig. 1B),  
142 highlighting the high epidemic and risk potential of PA154197.

143

#### 144 *Sequencing type, phylogenetic position, and genomic islands of PA154197*

145 We then sequenced the genome of PA154197 which resulted in one single circular chromosome  
146 with a length of 6,445,239 bp and a GC content of 66.38%. A total number of 5,923 genes are  
147 predicted in PA154197 genome which include 5,816 coding gene sequences (CDS), 26 pseudo-  
148 genes, 12 rRNA, 65 tRNA and 4 ncRNA (Table 1). Based on PubMLST, PA154197 is assigned  
149 to the multilocus sequence typing (MLST) 550, a clonal complex which is currently shared by two  
150 additional clinical isolates, VW0289 and AUS544 from the CF patients in the Netherland and  
151 Australia, respectively (Fig. 2A), but the complete genome sequences of these two strains are  
152 unavailable. PAST analysis revealed that PA154197 belongs to the Serotype O9 (26) (Table 1).  
153 Analyzing its accessory genome identified 21 genome islands (GIs) including 3 prophages (Table  
154 S1). In addition to hypothetical proteins, a large number of metabolic enzymes such as  
155 oxidoreductase, oxygenase and halogenase, as well as the AraC and LysR type transcription

156 regulators are encoded in these GIs, implying the potential roles of the accessory genome of  
157 PA154197 in the adaptation and fitness of the bacterium.

158 To examine the phylogenetic relationship of PA154197 with other *P. aeruginosa* strains, we  
159 constructed a phylogenetic tree based on 140,634 SNPs generated from 150 *P. aeruginosa*  
160 genomes which include all publicly-available complete genomes (78 as of October 2017) and  
161 representative non-complete genomes. As shown in Fig 2B, PA154197 exhibits a distinct  
162 phylogenetic position from other genomes available in the database. This may indicate its unique  
163 virulence and pathogenic potentials.

164

### 165 ***Antibiotic resistance genes and mutational changes therein***

166 Using Resistance Gene Identifiers (RGI), we then identified antibiotic resistance genes in  
167 PA154197 against the Comprehensive Antibiotic Resistance Database (CARD)(27), and examined  
168 genomic variations including mutations, deletions and indels in these genes with the genome of  
169 PAO1 as the reference (Table 2). It was revealed that PA154197 contains a large number of  
170 mutations associated with antibiotic resistance genes, including both previously reported genetic  
171 variations and those newly identified in PA154197. Several well established mutations include an  
172 8-bp deletion in the *mexT* gene which leads to up-regulation of the MexEF-OprN efflux pump and  
173 down-regulation of the OprD porin, and consequently resistance to fluoroquinolones and  
174 imipenem; the T105A substitution in AmpC, which causes resistance to non-carbapenem  $\beta$ -  
175 lactams (28), and the T83I substitution in the so called quinolone resistance-determining region  
176 (QRDR) of GyrA, conferring quinolone resistance. Another genomic variation commonly found  
177 to cause resistance in many *P. aeruginosa* isolates is the non-synonymous mutations in the TetR  
178 transcriptional regulator NalC which often leads to aztreonam resistance (29). Three non-



179 synonymous mutations, G71-E, E153-Q, S209-R, are identified in the *nalC* gene in PA154197  
180 (Table 2).

181  
182 New genomic variations that potentially lead to antibiotic resistance is also identified in  
183 PA1541197, such as a 6-bp deletion (corresponding to the deletion of E959 and S969) in the C-  
184 terminal of GyrA and a E76-\*(stop codon) mutation in the *mexR* gene which will lead to pre-  
185 mature termination of MexR at E76 and potentially de-repression of the MexAB-OprM major  
186 efflux pump, causing multidrug resistance(30). Mutations that potentially de-repress or induce the  
187 expression of several other efflux pumps are also identified in the corresponding transcription  
188 regulators or the promoter region of the efflux genes. For example, a single point mutation H398R  
189 is identified in *parS* gene which regulates the expression of the *mexEF-oprN* efflux pump (31). A  
190 5-nucleotides alteration in the promoter region (-1 to -250bp) of the *mexGHI-opmD* operon is  
191 present in PA154197 compared with that in PAO1, which may lead to the expression change of  
192 the MexGHI-OpmD efflux pump. A complete summary of the identified genomic variations in all  
193 the antibiotic resistance genes is provided in Table 2.

194  
195 ***Expression of the resistance genes and the functional genome of P. aeruginosa PA154197***

196 To examine the resistance mechanisms of PA154197 especially the expression levels of the  
197 resistance genes identified, we performed a comparative transcriptome analysis on PA154197 and  
198 the reference strain PAO1 using RNA-seq. Among the 5,543 orthologous genes identified in the  
199 two strains using progressiveMauve (32), differential expression of 3,148 genes are observed and  
200 their expression levels are compared using DESeq (33) (Fig. 3 and Table S2). Notably, among the  
201 genes which display significantly higher expression levels in PA154197 than in PAO1, those

202 encoding four efflux pumps, such as *mexEF-oprN* (PA2493-PA2495), *mexRAB-oprM* (PA0424-  
203 PA0427), *mexGHI-opmD* (PA4205-PA4208), and *mexKJL* (PA3676-PA3678) are observed (Fig.  
204 3), consistent with the MDR profile of PA154197. Genes that confer resistance to specific  
205 antibiotics, such as that of *ampC*, *gyrA*, *gyrB*, and *parC*, *parE*, are not differentially expressed in  
206 the RNA-Seq analysis, suggesting that over-expression of several multidrug efflux pumps may  
207 play a major role in the MDR development in PA154197. COG functional distribution analysis of  
208 the differentially expressed genes also reveals the enrichment of efflux pump genes among all the  
209 genes which are expressed at a higher level in PA154197 than in PAO1 (Fig S1).

210 To verify the relative expression levels of these genes in the two strains, we conducted RT-qPCR  
211 analysis. As shown in Fig 4B, consistent with the RNA-Seq data, the MexEF-OprN efflux system  
212 displayed the most significant higher expression (265-574 fold) in PA154197 than in PAO1,  
213 followed by the MexGHI-OpmD (8.5-41.9 fold) and the MexAB-OprM (4.6-11 fold) efflux system.  
214 On the other hand, another efflux system which over-expression is associated with  
215 aminoglycosides resistance, the MexXY-OprD system, did not show increased relative expression  
216 in PA154197 in either RNA-Seq or the RT-qPCR analysis, consistent with the fact that PA154197  
217 remains susceptible to the aminoglycoside antipseudomonal drug amikacin (Fig 1). Overall, an EB  
218 efflux assay showed the hyper-efflux activity in PA154197 than in PAO1 (Fig 4C), suggesting that  
219 over-expression of the efflux pumps MexEF-OprN, MexAB-OprM, and MexGHI-OpmD may  
220 play a major role in conferring MDR in PA154197. RT-qPCR analysis also revealed the decreased  
221 expression of another resistance gene *oprD* in PA154197 which serves as the entry portal of  
222 imipenem, consistent with the observed imipenem resistance (MIC as 8 $\mu$ g/ml) in this strain.

223

224 ***Virulence of P. aeruginosa PA154197***

225 Our comparative transcriptome analysis also reveals a significantly higher expression of several  
226 virulence genes in PA154197 than in PAO1 (Fig 3 and Table S2). These include the type III (*psc*  
227 genes) and the type VI (*tss* and *hcp-I* genes) secretion systems, pyocyanin production (*phz* genes),  
228 the PQS quorum sensing system (*pqs* genes), and a series of Fe and heme acquisition genes (*fep*  
229 and *has* genes). On the other hand, several genes involved in biofilm formation (such as *psl*, *alg*,  
230 *lecA*), motility, pili and fimbrial assembly proteins (such as *cup* genes), and pyoverdine production  
231 (*pvd* genes) are expressed at a lower level in PA154197 than in PAO1.

232 To examine the virulence factors production and the virulence of PA154197, we examined  
233 pycyanin (PYO) and pyoverdine production, swimming and swarming motilities, and biofilm  
234 formation of PA154197 and compared with that of PAO1. As shown in Fig 5, PA154197 cells  
235 display a significantly higher PYO production than PAO1 cells when grown on both LB plate and  
236 in LB liquid broth (Fig 5A). In contrast, PA154197 displays reduced pyoverdine production  
237 compared to PAO1 (Fig 5B). Consistent with the lower expression of biofilm genes in PA154197  
238 than in PAO1, PA154197 displays a reduced biofilm formation capability as examined by the  
239 crystal violet staining (Fig. 5C). In terms of the motility of the bacterium, PA154197 displays a  
240 comparable swimming activity with that of PAO1, but a defective swarming motility (Fig. 5D)  
241 which is consistent with the lower expression of the pili and fimbria assembly genes in this strain.  
242 To evaluate the in vivo virulence of PA154197, we conducted *Caenorhabditis elegans* fast killing  
243 and slow killing assays which are established infection models to evaluate the cytotoxicity and  
244 pathogenicity of *P. aeruginosa*, respectively(34). We found that the two strains display a  
245 comparable cytotoxicity and pathogenicity (virulence) (Fig. 5E) to the *C. elegans* host. Together,  
246 these studies indicate that PA154197 over-expresses a subset of virulence factors and does not  
247 display a compromised virulence as reported for many other resistant strains.

248

249 ***The Pqs quorum sensing system is activated in PA154197 independent of the primary QS system***

250 ***Las and Rhl***

251 It is known that three hierarchically organized QS systems, Las, Rhl, and Pqs, regulate the  
252 production of an arsenal of virulence factors in *P. aeruginosa* with each being primarily associated  
253 with the elastase (encoded by *lasB* gene), rhamnolipid (encoded by *rhlA* gene) and pyocyanin  
254 (encoded by *phz* genes) production, respectively (35, 36) (Fig 6A). Among them, the Las system  
255 proceeds the Rhl and Pqs systems and is the master regulator of the QS circuit. Several previous  
256 epidemiological survey and molecular evolutionary studies have identified *lasR* null and mutant  
257 variants in clinical isolates and ascribed the attenuated virulence of the isolates to QS deficiency  
258 caused by Las inactivation. To investigate the underlying mechanisms of the uncompromised  
259 virulence of PA154197, we examined the RNA-Seq transcription levels of the QS systems and  
260 their correspondingly regulated genes, especially virulence genes. We found that while expression  
261 of the *lasIR* and *rhlIR* in PA154197 is undetectable, expression of the genes encoding the  
262 secondary QS system *pqsA-E* is top three significantly expressed ( $\text{Log}_2$  RPKM abundance in a  
263 range of 4.1 – 5.4) gene operon in PA154197 than in PAO1. Consistently, genes primarily  
264 controlled by the Las and Rhl systems, such as *toxA*, *lasB*, *lecA* are expressed in a lower level in  
265 PA154197 than in PAO1, whereas genes controlled by Pqs, such as *phz* genes, *pqsA-E*, and *phnAB*  
266 are expressed in a significantly higher level in PA154197 than in PAO1 (Fig 6A and Table S2).  
267 RT-qPCR analysis confirmed this observation (Fig 6B). These data suggest that the secondary QS  
268 system Pqs is activated and expressed independent of the primary QS systems Las and Rhl in  
269 PA154197, which may account for the hyper-production of a subset of virulence factors and  
270 consequently its uncompromised virulence.

271

## 272 **Discussion**

273 As a successful and ubiquitous pathogen, *P. aeruginosa* is equipped with extraordinary  
274 machineries to adapt to the host environments and antibiotic therapies to survive and disseminate.  
275 As a result, the disease development caused by *P. aeruginosa* infections is driven by several  
276 dynamic factors, including bacterial pathogenesis, selective forces resulting from the antimicrobial  
277 interventions, and the fitness costs of resistance development. It is generally recognized that while  
278 acquisition of antibiotic resistance mechanisms confers selective advantages in the presence of  
279 antimicrobial therapies, expressing and maintenance of the resistance determinants often incurs  
280 metabolic costs to the pathogen and consequently compromises its fitness and pathogenicity  
281 potentials (5). How *P. aeruginosa* reconciles this scenario and succeeds in the dynamic cycle of  
282 infection and dissemination is not known. In this study, we identify and utilize an MDR *P.*  
283 *aeruginosa* isolate PA154197 which displays a comparable MDR profile to the epidemic high-risk  
284 clone ST175 but does not exhibit compromised virulence as a paradigm to examine the underlying  
285 pathoadaptive mechanisms. Comparative transcriptome and RT-qPCR analysis reveals an  
286 uncoordinated, significant activation of the Pqs quorum sensing system and its regulated virulence  
287 genes in PA154197 independent of the primary QS Las and Rhl systems, providing a  
288 compensatory mechanism for virulence factor production without the activation of the master and  
289 primary QS systems Las and Rhl, as well as the hundreds of genes regulated by them. A schematic  
290 diagram to illustrate this pathoadaptive mechanism is shown in Fig 7.

291

292 Several previous studies reported QS deficiency in antibiotic resistant clinical isolates and  
293 attributed the attenuated virulence of the strains to this mechanism, as these mutants are proposed

294 to be social cheaters that exploit shared QS products without incurring metabolic costs to  
295 themselves (18-21). However, majority of these studies were based on comparative genomic  
296 analysis to identify mutations in the QS system genes, and the identified variations were mainly  
297 found in the master QS regulator LasR, including both *lasR*-null and various *lasR* point mutations.  
298 Consistently, the identified strains often display an overall QS-inactivation phenotype, such as  
299 decreased production of all the major QS regulated virulence factors including elastase,  
300 rhamnolipids, pyoverdine, pyocyanin. Different from these *lasR* defective isolates, PA154197  
301 produces a significantly higher amount of PYO, a major virulence factor secreted by *P. aeruginosa*  
302 (37), and other Pqs regulated gene products than PAO1, while a lower level of Las and Rhl  
303 regulated virulence factors and genes than in PAO1. This uncoupled activation of Pqs system  
304 ensures the production of a major virulence factor PYO with minimal metabolic burden, thus is  
305 beneficial to the fitness and virulence of the pathogen. How *P. aeruginosa* achieves this differential  
306 activation is not known currently. We compared the promoter regions of the *lasRI*, *rhlRI*, *pqsR*,  
307 and *pqsA-E* operons with the corresponding sequences in PAO1, but did not find any nucleotide  
308 alternations that may account for the differential activation of *pqs* genes. Comparative genomics  
309 analysis revealed a point mutation Q98P in PA154197 LasR which is located at the  $\alpha 5$  of the N-3-  
310 oxo-dodecanoyl-homoserine lactone binding domain of the protein but the residue is not located  
311 in the binding pocket (38). Whether this point mutation leads to differential activation of the Pqs  
312 system warrants further investigations. Notably, Las independent activation of a downstream QS  
313 system was also reported in a collection of *P. aeruginosa* isolates from CF patients in which half  
314 of the *lasR*-null strains were found to retain the RhlR activity (20). Hence, adaptable QS hierarchy  
315 which uncouples a downstream QS system from the master regulator LasR may represent an  
316 emerging compensatory mechanism that facilitates the fitness, virulence, and persistence of *P.*

317 *aeruginosa* in the host settings.

318

319 With the increasing frequency of detecting the MDR *P. aeruginosa* isolates from various sources,  
320 it is recognized that the resistance traits of a strain are often the result of a complex interaction of  
321 several cellular processes and no individual mutation or resistance gene is sufficient to confer  
322 clinically significant resistance (39, 40). In this study, we identified multiple genetic variations  
323 potentially associated with the resistance development in PA154197. These include both  
324 machineries which confer resistance to a diverse class of antibiotics and hence causing MDR(4),  
325 such as over-expression of multidrug efflux pumps, and genes which mutations result in resistance  
326 to specific classes of antibiotics, such as mutations in *ampC* and *gyrA*. Transcriptome and RT-  
327 qPCR confirmed the hyper-expression of three multidrug efflux pumps, MexAB, MexEF, and  
328 MexGHI in PA154197, but the expression of *ampC* and *gyrA* was found to be in a similar level to  
329 that in PAO1. Whether these two genes contribute to the profile and level of resistance exhibited  
330 in PA154197 remains further molecular validation. Notably, both the T105A mutation in AmpC  
331 and T83I mutation in GyrA are the well characterized genetic variants associated with antibiotic  
332 resistance, which have been termed as the PDC-3 type AmpC variant (28) and the quinolone  
333 resistance-determining region (QRDR) hotspot mutation, respectively (14). However, these two  
334 mutations are also identified in other *P. aeruginosa* isolates we surveyed such as PA150577 which  
335 does not display resistance to  $\beta$ -lactams or fluoroquinolones (data not shown). Hence, the observed  
336 resistance to antipseudomonal aztreonam (monobactam) and imipenem (carbapenam) in  
337 PA154197 may not be due to the T105A mutation in AmpC, and the observed resistance to  
338 ciprofloxacin and levofloxacin (fluoroquinolone) may not be due to the T83I mutation in GyrA.  
339 In addition, acquiring additional and extended-spectrum  $\beta$ -lactamase on mobile genetic elements

340 represents another common mechanism of  $\beta$ -lactam resistance in *P.aeruginosa* (41), but no  
341 plasmid encoding  $\beta$ -lactamases are identified in PA154197. Indeed, it has been proposed that  
342 genetic background of the drug resistant strains influences the epistatic interactions of the various  
343 resistant determinants and the resistance readout (42). This highlights the intricacy of the  
344 mechanisms that underlie resistance development of MDR strains and our ongoing targeted  
345 molecular investigations and evolutionary trajectory analysis may provide mechanistic insight into  
346 these processes.

347

## 348 **Materials and methods**

349

### 350 *Minimum inhibitory concentration measurements*

351 MICs were measured following the standard protocol from ASM with slight modification (43).  
352 Single fresh colonies of PA154197 and PAO1 were inoculated in Lysogeny broth (LB) overnight  
353 at 37°C with 220-rpm agitation. The resulting cell culture was diluted and distributed to the wells  
354 of 96-well plate with a final cell density as  $5 \times 10^5$  CFU/ml. Selected antibiotics were added to the  
355 wells with concentration ranging from 0.25 to 128  $\mu$ g/ml. Plates were incubated at 37 °C for 16-  
356 20 h. MIC values were determined as the concentration of antibiotics. Antibiotic susceptibility  
357 profiles of the strains indicated are displayed in color scheme with low susceptibility (high MIC  
358 values) in red color and high susceptibility (low MIC values) in blue color. The color scheme is  
359 constructed using background filling application in the Excel of MS Office.

360

### 361 *Genomic DNA extraction*

362 Extraction of the genomic DNA of PA154197 was performed following the description in a



363 previous study (44). Briefly, PA154197 was cultivated in Luria-Bertani (LB) broth overnight with  
364 shaking (220 rpm) at 37°C. Bacterial cells were harvested from 1 ml culture via centrifugation at  
365 10,000 rpm for 10 minutes. Genomic DNA was extracted using the QIAamp DNA Mini Kit  
366 following the manufacturer's instructions (Qiagen, Hilden, Germany). The concentration and  
367 quality of genomic DNA was determined by NanoDrop and agarose (0.8%) gel electrophoresis.

368

### 369 *Genome sequencing and annotations*

370 Genome sequencing of *P. aeruginosa* PA154197 was conducted on the Illumina NextSeq (300  
371 Cycles) PE150 High Output Flow Cell platform in Georgia Genomics Facility at University of  
372 Georgia, USA. SPAdes (45) was used to assemble the reads after removal of adapter, primers, and  
373 low quality bases using Trimmomatic (46). The initial assembly of PA154197 genome yielded 21  
374 contigs. The 21 contigs were aligned against the reference genome of PAO1 and ATCC 27853 and  
375 gaps were filled using Sanger sequencing to generate the complete genome sequence of PA154197.  
376 Gene calling and annotation were carried out using the National Center for Biotechnology  
377 Information (NCBI)'s Prokaryotic Genome Annotation Pipeline 2.0 (PGAP) (47).

378

### 379 *Sequence type and phylogenetic analyses*

380 The multiple locus sequence type (MLST) and serotype of PA154197 was predicted based on the  
381 PubMLST database ([www.pumlst.org](http://www.pumlst.org)) and the *Pseudomonas aeruginosa* serotyper (PAst) tool  
382 (26).

383

384 To carry out the phylogenetic analysis, we downloaded all available complete genomes of *P.*  
385 *aeruginosa* (one representative per distinct phylogenetic group) from NCBI GenBank (78 genomes

386 by Oct 2017) (Table S3, for reviewers' information only) and selected 72 representative non-  
387 complete genomes that are distributed in the 32 phylogenetic groups as defined in the NCBI. Single  
388 nucleotide polymorphisms (SNPs) were collected using Parsnp with default parameters (48) and  
389 that of PAO1 served as the reference. SNPs were then used to build a maximum likelihood tree in  
390 MEGA (49) with the following parameters: Tamura-Nei substitution model, gamma rate  
391 distribution among sites, Nearest-Neighbor-Interchange for tree inference options, a bootstrap  
392 value 100, and initial tree was generated using the Neighbor Joining method. Variants were called  
393 using the Harvest tools (48) and annotated using SnpEff (50).

394

#### 395 *Identifications of antibiotic resistance genes (ARG) and mutations therein*

396 Resistance Gene Identifiers (RGI) from the Comprehensive Antibiotic Resistance Database  
397 (CARD) (27) were used to identify antibiotic resistance genes in PA154197 using “Perfect and  
398 Strict hits only” parameter. BLAST of all genes from the present study against the antibiotic  
399 resistance gene database of ResFinder (version 2.1) (51) and BLAST against a database of  
400 antibiotic resistance genes curated by ourselves based on previous reports (52) were also conducted.

401

402 Variants of all predicted antibiotic resistance genes were collected from the annotation with SnpEff  
403 (50) using PAO1 as the reference. SNPs that cause non-synonymous mutations and gaps less than  
404 6 bp were also identified and summarized.

405

#### 406 *RNA-seq*

407 RNA extraction, quality control, and RNA-Seq were performed in PA154197 and the reference  
408 strain PAO1 with three biological replicates following our previous descriptions (44). Stranded

409 libraries for all RNA samples were constructed using Kapa Biosystems RNA library preparation  
410 chemistry in Georgia Genomics Facility at University of Georgia.

411  
412 Orthologous genes between PAO1 and PA154197 were obtained by comparison using  
413 *progressiveMauve* with default settings (32) and were employed in the following RNA-seq  
414 analysis. RNA-seq reads were pre-processed for quality control using Trimmomatic (46) and were  
415 then mapped to the reference genomes of PAO1 and PA154197 respectively, using Stampy (to  
416 speed up the alignment process, alignment was initially conducted using BWA-MEM with default  
417 parameters (53) then passed to Stampy with the flags --bamkeepgoodreads -M) (54). SAMtools  
418 and BamTools were used for format conversions, statistics, and quality assessment and control  
419 (55). The Integrative Genomics Viewer was used to visually inspect mapping quality (56).  
420 Fragments counting per genomic features (genes) were performed using featureCounts  
421 (*featureCounts -R -M -Q 10 -p -P -s 2 -t gene -g locus\_tag --largestOverlap*) (57). Reads that  
422 mapped with MAPQ scores below 10 were removed. Enforcing a MAPQ score below 10 also  
423 excludes multi-mapped reads albeit the percentage of this category is low (data not shown). DESeq  
424 was employed to analyze differentially expressed genes. Selective genes with high expression  
425 levels in PA154197 were verified using RT-qPCR. Primers used in the present study are listed in  
426 Supplementary Table S4.

427

#### 428 ***Motility assays***

429 The assays were performed as previously described with slight modifications(58). (1) Swimming  
430 motility. The semi-solid motility plates were prepared by mixing the LB broth with 0.25% (wt/vol)

431 agarose. Overnight cultures of PAO1 and PA154197 were sub-cultured (1:200 dilution) into  
432 LB broth. When OD<sub>600</sub> reached 0.1-0.2, 2 µl of cell was spotted at the center of a freshly prepared  
433 semi-solid swimming plate. The plates dried at room temperature for 1 h and subsequently were  
434 incubated at 37°C for 8 h. Swimming motility was evaluated by measuring the diameter of the  
435 covered areas. All assays were conducted in triplicates. (2) Swarming motility. The motility plates  
436 were prepared by mixing the M8 broth [21.1 mM Na<sub>2</sub>HPO<sub>4</sub>, 11 mM KH<sub>2</sub>PO<sub>4</sub>, 42.8 mM NaCl, 9.3  
437 mM NH<sub>4</sub>Cl, 1 mM MgSO<sub>4</sub>, 0.2% glucose, 0.2% casamino acids, pH 6.5] with 0.5% (wt/vol)  
438 agarose. 2 µl of sub-cultures of PAO1 and PA154197 (OD<sub>600</sub> of 0.1-0.2) as mentioned above was  
439 spotted at the center of a pre-dried swarming plate. The plates were incubated at 37°C, and images  
440 of the developed swarms were recorded at 16-48 h. All assays were conducted in triplicates.

441

#### 442 ***Pyocyanin production assay***

443 Pyocyanin production was examined according to a protocol described previously with  
444 modification (44). 1 ml of the bacterial culture was subject to centrifugation at 13,000 rpm for 5  
445 min. The supernatant was collected and extracted with 600 µl chloroform following vortex for 10  
446 s twice. After centrifugation at 13,000 rpm for 5 min, the chloroform phase was transferred into a  
447 clean tube, and subsequently mixed with 0.5 ml 0.2 M HCl followed by gentle shaking to transfer  
448 the pyocyanin to the aqueous phase. The concentration of PYO was determined by measuring the  
449 absorbance of the aqueous phase at 510 nm.

450

#### 451 ***Biofilm assay***

452 Crystal violet staining method was used to determine biofilm formation of PAO1 and PA154197  
453 with slight modifications (59). Overnight cultures of *P. aeruginosa* cells were inoculated into

454 0.5 ml of LB broth in 5 mL round bottom polypropylene Falcon tubes (final cell density as 0.1)  
455 and incubated statically at 37 °C for 24 or 48 h to allow biofilm formation. After removing the  
456 medium, the biofilms formed at the bottom of the tubes were gently washed with phosphate  
457 buffered saline (PBS) three times to remove residual planktonic cells. The tubes were then air-  
458 dried and stained with 0.1% crystal violet for 15 min at room temperature. After washing the tubes  
459 three times with sterile distilled water to remove excess dye molecules, biofilms were dissolved in  
460 150 µl of 30% acetic acid and the optical density (OD) was measured at 595 nm using a 96-well  
461 plate spectrometer reader. All experiments were performed in triplicates.

462

### 463 *Nematode killing assay*

464 To examine the virulence and pathogenesis of PA154197 compared with PAO1, fast and slow  
465 killing kinetics of *Caenorhabditis elegans* (*C. elegans*) were performed with slight modification  
466 (60). (1) Fast killing assay. Preparation of the killing plates can be divided into two steps. i) 100  
467 µL of overnight culture of PA154197 or PAO1 were spread onto 3.5 cm LB agar plates and  
468 incubated at 25°C for 2 days to produce the toxins. ii) Lawn of PA154197 or PAO1 was scraped  
469 from LB agar plates containing the toxins completely using a sterile L spreader. *C. elegans* strain  
470 N2 were synchronized by isolating eggs from gravid adults and plating eggs on to lawns of *E. coli*  
471 OP50 on NGM [0.25% peptone, 0.3% NaCl, 2% agar, 5 µg/ml cholesterol, 1 mM MgSO<sub>4</sub>, and 25  
472 mM KH<sub>2</sub>PO<sub>4</sub> (pH 6)] agar plates followed by incubation at 25°C for 48-52 h to reach the L4 stage.  
473 Each fast killing plate was seeded with 20-30 worms. Plates were incubated at 25°C and scored  
474 every 4-6 h. A worm was considered to be dead when it no longer responded to touch. (2) Slow  
475 killing assay. The procedure was similar as fast killing assay except the preparation of killing plates.  
476 For slow killing plates, lawn of PA154197 or PAO1 was not moved away. All experiments were

477 performed in triplicates.

478

#### 479 ***Pyoverdine (PVD) production assay***

480 The siderophore pyoverdine is observed under UV light as a fluorescent zone around the colony  
481 (61). Fresh single colonies of PA154197 and PAO1 were inoculated in LB medium overnight at  
482 37 °C with 220-rpm agitation. Following diluting overnight culture to  $1 \times 10^9$  CFU/ml with fresh  
483 LB medium, 10  $\mu$ l cell suspension was then spotted on a LB agar plate. The plate was incubated  
484 at 37 °C for 16-20 h. Fluorescent PVD was visualized and imaged under UV light.

485

#### 486 **Efflux activity assay**

487 Efflux activity of PA154197 and PAO1 cells is examined by ethidium bromide accumulation as  
488 described previously (62). Overnight cultures of PA154197 and PAO1 cells were diluted 1:100 in  
489 fresh LB broth and grown at 37°C until the OD<sub>600nm</sub> reached 0.5-0.6. The cells were collected by  
490 centrifugation at 4,000g for 10 min at 4°C, washed three times with efflux buffer (50 mM  
491 potassium phosphate buffer, pH 7.0, containing 5 mM MgSO<sub>4</sub>), and then resuspended in the same  
492 buffer to an OD<sub>600 nm</sub> of 0.5. Following incubation at room temperature (25°C) for 3 min in the  
493 presence of 25 mM glucose to energize the cells, ethidium bromide (Sigma-Aldrich) was added to  
494 a final concentration of 2  $\mu$ M. The ethidium bromide fluorescence was measured continuously  
495 using the Varioskan Flash Multimode Microplate Reader (Thermal Scientific) at Ex/Em  
496 wavelengths of 500 nm/580 nm. Higher fluorescence signal indicates lower efflux activity. Assays  
497 were performed in triplicates and mean values were used to plot the efflux curve.

498

499 **Acknowledgements**

500 We thank Dr. Karen Yuen (School of Biological Sciences, HKU) for her help to establish the *C.*  
501 *elegans* killing assay. This work is supported by the Hong Kong University Grants Council  
502 General Research Fund (17142316, to AY), Seed Funding for Strategic Interdisciplinary Research  
503 Scheme (HKU 2017, to AY), and Shenzhen City Knowledge Innovation Plan  
504 (JCYJ20160530174441706 to AY).

505

506 **Author Contributions:** HC, AY designed the studies. HC, TX, YL, ZX, YKL, SB, VBB,  
507 conducted the experiments. HL provided sequencing service. PW provided clinical strains. HC,  
508 TX, YL, ZX, AY wrote the manuscript.

509

510 The authors do not have conflict of interests to declare.

511

512

## 513 **References**

- 514
- 515 1. Moradali MF, Ghods S, Rehm BH. 2017. *Pseudomonas aeruginosa* lifestyle: a paradigm  
516 for adaptation, survival, and persistence. *Frontiers in cellular and infection microbiology*  
517 7:39.
  - 518 2. Breidenstein EB, de la Fuente-Núñez C, Hancock RE. 2011. *Pseudomonas aeruginosa*: all  
519 roads lead to resistance. *Trends in microbiology* 19:419-426.
  - 520 3. Cheng VC, Wong SC, Ho P-L, Yuen K-Y. 2016. Strategic measures for the control of  
521 surging antimicrobial resistance in Hong Kong and mainland of China. *Emerging microbes*  
522 & infections 4:e8.
  - 523 4. Poole K. 2011. *Pseudomonas aeruginosa*: resistance to the max. *Frontiers in microbiology*  
524 2:65.
  - 525 5. Geisinger E, Isberg RR. 2017. Interplay between antibiotic resistance and virulence during  
526 disease promoted by multidrug-resistant bacteria. *The Journal of infectious diseases*  
527 215:S9-S17.
  - 528 6. Juan C, Peña C, Oliver A. 2017. Host and pathogen biomarkers for severe *Pseudomonas*  
529 *aeruginosa* infections. *The Journal of infectious diseases* 215:S44-S51.
  - 530 7. Lister PD, Wolter DJ, Hanson ND. 2009. Antibacterial-resistant *Pseudomonas aeruginosa*:  
531 clinical impact and complex regulation of chromosomally encoded resistance mechanisms.  
532 *Clinical microbiology reviews* 22:582-610.
  - 533 8. Murray JL, Kwon T, Marcotte EM, Whiteley M. 2015. Intrinsic antimicrobial resistance  
534 determinants in the superbug *Pseudomonas aeruginosa*. *MBio* 6:e01603-15.
  - 535 9. Li X-Z, Plésiat P, Nikaido H. 2015. The challenge of efflux-mediated antibiotic resistance  
536 in Gram-negative bacteria. *Clinical microbiology reviews* 28:337-418.
  - 537 10. Sun J, Deng Z, Yan A. 2014. Bacterial multidrug efflux pumps: mechanisms, physiology  
538 and pharmacological exploitations. *Biochemical and biophysical research communications*  
539 453:254-267.
  - 540 11. Oliver A, Mulet X, López-Causapé C, Juan C. 2015. The increasing threat of *Pseudomonas*  
541 *aeruginosa* high-risk clones. *Drug Resistance Updates* 21:41-59.
  - 542 12. Quale J, Bratu S, Gupta J, Landman D. 2006. Interplay of efflux system, *ampC*, and *oprD*



- 543 expression in carbapenem resistance of *Pseudomonas aeruginosa* clinical isolates.  
544 Antimicrobial agents and chemotherapy 50:1633-1641.
- 545 13. Poole K. 2005. Aminoglycoside resistance in *Pseudomonas aeruginosa*. Antimicrobial  
546 agents and Chemotherapy 49:479-487.
- 547 14. Akasaka T, Tanaka M, Yamaguchi A, Sato K. 2001. Type II topoisomerase mutations in  
548 fluoroquinolone-resistant clinical strains of *Pseudomonas aeruginosa* isolated in 1998 and  
549 1999: role of target enzyme in mechanism of fluoroquinolone resistance. Antimicrobial  
550 agents and chemotherapy 45:2263-2268.
- 551 15. Köhler T, Michea-Hamzehpour M, Epp SF, Pechere J-C. 1999. Carbapenem activities  
552 against *Pseudomonas aeruginosa*: respective contributions of OprD and efflux systems.  
553 Antimicrobial agents and chemotherapy 43:424-427.
- 554 16. Magiorakos AP, Srinivasan A, Carey R, Carmeli Y, Falagas M, Giske C, Harbarth S,  
555 Hindler J, Kahlmeter G, Olsson-Liljequist B. 2012. Multidrug-resistant, extensively drug-  
556 resistant and pandrug-resistant bacteria: an international expert proposal for interim  
557 standard definitions for acquired resistance. Clinical microbiology and infection 18:268-  
558 281.
- 559 17. Gómez-Zorrilla S, Juan C, Cabot G, Camoez M, Tubau F, Oliver A, Dominguez MA, Ariza  
560 J, Peña C. 2016. Impact of multidrug resistance on the pathogenicity of *Pseudomonas*  
561 *aeruginosa*: in vitro and in vivo studies. International journal of antimicrobial agents  
562 47:368-374.
- 563 18. Wang K, Chen Y-q, Salido MM, Kohli GS, Kong J-l, Liang H-j, Yao Z-t, Xie Y-t, Wu H-  
564 y, Cai S-q. 2017. The rapid *in vivo* evolution of *Pseudomonas aeruginosa* in ventilator-  
565 associated pneumonia patients leads to attenuated virulence. Open biology 7:170029.
- 566 19. Köhler T, Buckling A, Van Delden C. 2009. Cooperation and virulence of clinical  
567 *Pseudomonas aeruginosa* populations. Proceedings of the National Academy of Sciences  
568 106:6339-6344.
- 569 20. Feltner JB, Wolter DJ, Pope CE, Groleau M-C, Smalley NE, Greenberg EP, Mayer-  
570 Hamblett N, Burns J, Déziel E, Hoffman LR. 2016. LasR variant cystic fibrosis isolates  
571 reveal an adaptable quorum-sensing hierarchy in *Pseudomonas aeruginosa*. MBio  
572 7:e01513-16.

- 573 21. Köhler T, Guanella R, Carlet J, Van Delden C. 2010. Quorum sensing-dependent virulence  
574 during *Pseudomonas aeruginosa* colonisation and pneumonia in mechanically ventilated  
575 patients. *Thorax* 65:703-710.
- 576 22. Skurnik D, Roux D, Cattoir V, Danilchanka O, Lu X, Yoder-Himes DR, Han K, Guillard  
577 T, Jiang D, Gaultier C. 2013. Enhanced in vivo fitness of carbapenem-resistant *oprD*  
578 mutants of *Pseudomonas aeruginosa* revealed through high-throughput sequencing.  
579 *Proceedings of the National Academy of Sciences* 110:20747-20752.
- 580 23. Roux D, Danilchanka O, Guillard T, Cattoir V, Aschard H, Fu Y, Angoulvant F, Messika  
581 J, Ricard J-D, Mekalanos JJ, Lory S, Pier GB, Skurnik D. 2015. Fitness cost of antibiotic  
582 susceptibility during bacterial infection. *Science Translational Medicine* 7:297ra114-  
583 297ra114.
- 584 24. Balasubramanian D, Kumari H, Mathee K. 2015. *Pseudomonas aeruginosa* AmpR: an  
585 acute–chronic switch regulator. *Pathogens and Disease* 73:1-14.
- 586 25. Cabot G, Ocampo-Sosa AA, Domínguez MA, Gago JF, Juan C, Tubau F, Rodríguez C,  
587 Moyà B, Peña C, Martínez-Martínez L, Oliver A. 2012. Genetic Markers of Widespread  
588 Extensively Drug-Resistant *Pseudomonas aeruginosa* High-Risk Clones. *Antimicrobial*  
589 *Agents and Chemotherapy* 56:6349-6357.
- 590 26. Thrane SW, Taylor VL, Lund O, Lam JS, Jelsbak L. 2016. Application of WGS data for  
591 O-specific antigen analysis and *in silico* serotyping of *Pseudomonas aeruginosa* isolates.  
592 *Journal of Clinical Microbiology* doi:10.1128/jcm.00349-16.
- 593 27. Jia B, Raphenya AR, Alcock B, Waglechner N, Guo P, Tsang KK, Lago BA, Dave BM,  
594 Pereira S, Sharma AN, Doshi S, Courtot M, Lo R, Williams LE, Frye JG, Elsayegh T,  
595 Sardar D, Westman EL, Pawlowski AC, Johnson TA, Brinkman FSL, Wright GD,  
596 McArthur AG. 2017. CARD 2017: expansion and model-centric curation of the  
597 comprehensive antibiotic resistance database. *Nucleic Acids Research* 45:D566-D573.
- 598 28. Berrazeg M, Jeannot K, Ntsogo Enguéné VY, Broutin I, Loeffert S, Fournier D, Plésiat P.  
599 2015. Mutations in  $\beta$ -Lactamase AmpC Increase Resistance of *Pseudomonas aeruginosa*  
600 Isolates to Antipseudomonal Cephalosporins. *Antimicrobial Agents and Chemotherapy*  
601 doi:10.1128/aac.00825-15.
- 602 29. Braz VS, Furlan JPR, Fernandes AFT, Stehling EG. 2016. Mutations in *NalC* induce

- 603 MexAB-OprM overexpression resulting in high level of aztreonam resistance in  
604 environmental isolates of *Pseudomonas aeruginosa*. FEMS Microbiology Letters  
605 363:fnw166-fnw166.
- 606 30. Choudhury D, Ghosh A, Dhar Chanda D, Das Talukdar A, Dutta Choudhury M, Paul D,  
607 Maurya AP, Chakravorty A, Bhattacharjee A. 2016. Premature Termination of MexR  
608 Leads to Overexpression of MexAB-OprM Efflux Pump in *Pseudomonas aeruginosa* in a  
609 Tertiary Referral Hospital in India. PLOS ONE 11:e0149156.
- 610 31. Wang D, Seeve C, Pierson LS, Pierson EA. 2013. Transcriptome profiling reveals links  
611 between ParS/ParR, MexEF-OprN, and quorum sensing in the regulation of adaptation and  
612 virulence in *Pseudomonas aeruginosa*. BMC Genomics 14:618.
- 613 32. Darling AE, Mau B, Perna NT. 2010. progressiveMauve: Multiple Genome Alignment  
614 with Gene Gain, Loss and Rearrangement. PLOS ONE 5:e11147.
- 615 33. Anders S, Huber W. 2010. Differential expression analysis for sequence count data.  
616 Genome Biology 11:R106.
- 617 34. Tan M-W, Rahme LG, Sternberg JA, Tompkins RG, Ausubel FM. 1999. *Pseudomonas*  
618 *aeruginosa* killing of *Caenorhabditis elegans* used to identify *P. aeruginosa* virulence  
619 factors. Proceedings of the National Academy of Sciences 96:2408-2413.
- 620 35. Nadal Jimenez P, Koch G, Thompson JA, Xavier KB, Cool RH, Quax WJ. 2012. The  
621 Multiple Signaling Systems Regulating Virulence in *Pseudomonas aeruginosa*.  
622 Microbiology and Molecular Biology Reviews 76:46-65.
- 623 36. Welsh MA, Blackwell HE. 2016. Chemical probes of quorum sensing: from compound  
624 development to biological discovery. FEMS Microbiology Reviews 40:774-794.
- 625 37. Pierson LS, Pierson EA. 2010. Metabolism and function of phenazines in bacteria: impacts  
626 on the behavior of bacteria in the environment and biotechnological processes. Applied  
627 Microbiology and Biotechnology 86:1659-1670.
- 628 38. Zou Y, Nair SK. 2009. Molecular Basis for the Recognition of Structurally Distinct  
629 Autoinducer Mimics by the *Pseudomonas aeruginosa* LasR Quorum-Sensing Signaling  
630 Receptor. Chemistry & Biology 16:961-970.
- 631 39. Feng Y, Jonker MJ, Moustakas I, Brul S, ter Kuile BH. 2016. Dynamics of mutations  
632 during development of resistance by *Pseudomonas aeruginosa* against five antibiotics.

- 633 Antimicrobial Agents and Chemotherapy doi:10.1128/aac.00434-16.
- 634 40. Jochumsen N, Marvig RL, Damkiær S, Jensen RL, Paulander W, Molin S, Jelsbak L,  
635 Folkesson A. 2016. The evolution of antimicrobial peptide resistance in *Pseudomonas*  
636 *aeruginosa* is shaped by strong epistatic interactions. *Nature Communications* 7:13002.
- 637 41. Zhao W-H, Hu Z-Q. 2013. Epidemiology and genetics of CTX-M extended-spectrum  $\beta$ -  
638 lactamases in Gram-negative bacteria. *Critical Reviews in Microbiology* 39:79-101.
- 639 42. Vogwill T, Kojadinovic M, MacLean RC. 2016. Epistasis between antibiotic resistance  
640 mutations and genetic background shape the fitness effect of resistance across species of  
641 *Pseudomonas*. *Proceedings of the Royal Society B: Biological Sciences* 283.
- 642 43. Lalitha MK. 2004. Manual on Antimicrobial Susceptibility Testing Performance standards  
643 for antimicrobial testing: Twelfth Informational Supplement 56238:3.
- 644 44. Cao H, Lai Y, Bougouffa S, Xu Z, Yan A. 2017. Comparative genome and transcriptome  
645 analysis reveals distinctive surface characteristics and unique physiological potentials of  
646 *Pseudomonas aeruginosa* ATCC 27853. *BMC Genomics* 18:459.
- 647 45. Bankevich A, Nurk S, Antipov D, Gurevich AA, Dvorkin M, Kulikov AS, Lesin VM,  
648 Nikolenko SI, Pham S, Prjibelski AD, Pyshkin AV, Sirotkin AV, Vyahhi N, Tesler G,  
649 Alekseyev MA, Pevzner PA. 2012. SPAdes: A New Genome Assembly Algorithm and Its  
650 Applications to Single-Cell Sequencing. *Journal of Computational Biology* 19:455-477.
- 651 46. Bolger AM, Lohse M, Usadel B. 2014. Trimmomatic: a flexible trimmer for Illumina  
652 sequence data. *Bioinformatics* 30:2114-2120.
- 653 47. Angiuoli SV, Gussman A, Klimke W, Cochrane G, Field D, Garrity GM, Kodira CD,  
654 Kyrpides N, Madupu R, Markowitz V, Tatusova T, Thomson N, White O. 2008. Toward  
655 an Online Repository of Standard Operating Procedures (SOPs) for (Meta)genomic  
656 Annotation. *OMICS: A Journal of Integrative Biology* 12:137-141.
- 657 48. Treangen TJ, Ondov BD, Koren S, Phillippy AM. 2014. The Harvest suite for rapid core-  
658 genome alignment and visualization of thousands of intraspecific microbial genomes.  
659 *Genome Biology* 15:524.
- 660 49. Tamura K, Stecher G, Peterson D, Filipski A, Kumar S. 2013. MEGA6: Molecular  
661 Evolutionary Genetics Analysis Version 6.0. *Molecular Biology and Evolution* 30:2725-  
662 2729.

- 663 50. Cingolani P, Platts A, Wang LL, Coon M, Nguyen T, Wang L, Land SJ, Lu X, Ruden DM.  
664 2012. A program for annotating and predicting the effects of single nucleotide  
665 polymorphisms, SnpEff. *Fly* 6:80-92.
- 666 51. Zankari E, Hasman H, Cosentino S, Vestergaard M, Rasmussen S, Lund O, Aarestrup FM,  
667 Larsen MV. 2012. Identification of acquired antimicrobial resistance genes. *Journal of*  
668 *Antimicrobial Chemotherapy* 67:2640-2644.
- 669 52. Sherrard LJ, Tai AS, Wee BA, Ramsay KA, Kidd TJ, Ben Zakour NL, Whiley DM,  
670 Beatson SA, Bell SC. 2017. Within-host whole genome analysis of an antibiotic resistant  
671 *Pseudomonas aeruginosa* strain sub-type in cystic fibrosis. *PLOS ONE* 12:e0172179.
- 672 53. Li H. 2013. Aligning sequence reads, clone sequences and assembly contigs with BWA-  
673 MEM. arXiv preprint arXiv 1303.3997.
- 674 54. Lunter G, Goodson M. 2011. Stampy: A statistical algorithm for sensitive and fast mapping  
675 of Illumina sequence reads. *Genome Research* 21:936-939.
- 676 55. Barnett DW, Garrison EK, Quinlan AR, Strömberg MP, Marth GT. 2011. BamTools: a  
677 C++ API and toolkit for analyzing and managing BAM files. *Bioinformatics* 27:1691-1692.
- 678 56. Thorvaldsdóttir H, Robinson JT, Mesirov JP. 2013. Integrative Genomics Viewer (IGV):  
679 high-performance genomics data visualization and exploration. *Briefings in*  
680 *Bioinformatics* 14:178-192.
- 681 57. Liao Y, Smyth GK, Shi W. 2014. featureCounts: an efficient general purpose program for  
682 assigning sequence reads to genomic features. *Bioinformatics* 30:923-930.
- 683 58. Ha D-G, Kuchma SL, O'Toole GA. 2014. Plate-Based Assay for Swimming Motility in  
684 *Pseudomonas aeruginosa*, p 59-65. *In* Filloux A, Ramos J-L (ed), *Pseudomonas Methods*  
685 *and Protocols* doi:10.1007/978-1-4939-0473-0\_7. Springer New York, New York, NY.
- 686 59. Au - O'Toole GA. 2011. Microtiter Dish Biofilm Formation Assay. *JoVE*  
687 doi:doi:10.3791/2437:e2437.
- 688 60. Kirienko NV, Cezairliyan BO, Ausubel FM, Powell JR. 2014. *Pseudomonas aeruginosa*  
689 PA14 Pathogenesis in *Caenorhabditis elegans*, p 653-669. *In* Filloux A, Ramos J-L (ed),  
690 *Pseudomonas Methods and Protocols* doi:10.1007/978-1-4939-0473-0\_50. Springer New  
691 York, New York, NY.
- 692 61. Yu X, Chen M, Jiang Z, Hu Y, Xie Z. 2014. The two-component regulators GacS and

693 GacA positively regulate a nonfluorescent siderophore through the Gac/Rsm signaling  
694 cascade in high-siderophore-yielding *Pseudomonas* sp. HYS. Journal of Bacteriology  
695 doi:10.1128/jb.01756-14.

696 62. Du D, Wang Z, James NR, Voss JE, Klimont E, Ohene-Agyei T, Venter H, Chiu W, Luisi  
697 BF. 2014. Structure of the AcrAB–TolC multidrug efflux pump. Nature 509:512.

698

699

700 **Figures legends:**

701 **Figure 1.** Antibiotic resistance profiles of PA154197. **A.** MIC values of various antibiotics to  
702 PA154197 and PAO1. **B.** MIC values of indicated antibiotics to the international high risk clone  
703 ST175 are retrieved from published data (25) and are compared with that of PA154197. Resistance  
704 levels are displayed in color scheme with low susceptibility (high MIC values) in red color and  
705 high susceptibility (low MIC values) in blue color. The color scheme is constructed using  
706 background filling application in the Excel of Microsoft Office.

707 **Figure 2.** Lineage complex of the MLST550 and phylogenetic position of PA154197. **A.**  
708 Geographical distribution of the three MLST550 *P. aeruginosa* strains currently available in  
709 pubMLST database, VW0289, VW0289, and PA154197. **B.** phylogenetic relationships of  
710 PA154197 with 149 *P. aeruginosa* strains including 78 complete and 71 incomplete genomes from  
711 representative 32 groups available in Genbank database (as of October 2017). The phylogenetic  
712 tree was constructed based on the SNPs identified using Harvest with 100 bootstrap and maximum  
713 likelihood (ML) criterion in MEGA 7 software. Scale bar indicates the branch length and circles  
714 on the nodes represent the statistical supports according to size. The denotation of the strain is  
715 listed in the Table S3 and PA15419 is highlighted in red.

716 **Figure 3.** The genome wide transcriptomic profile of *P. aeruginosa* PA154197 and PAO1. Orange  
717 dots indicate genes with higher relative expression levels in PA154197 than in PAO1 and blue  
718 dots represent genes with higher relative expression level in PAO1 than in PA154197. The black  
719 dashed lines represent 4 fold (value of  $\log_2 > 2$ ) changes in expression. Genes and operons with  
720 distinctive expression patterns in the two strains are indicated. Among them, antibiotic resistance



721 genes are highlighted in red, genes encoding virulence factors are highlighted in green (expressed  
722 in a higher level in PA154197 than PAO1) or purple (expressed in a higher level in PAO1 than in  
723 PA154197). X-axis represents the gene locus with PAO1 genome as reference.

724 **Figure 4.** Several multidrug efflux pump genes are over-expressed in *P. aeruginosa* PA154197.

725 **A.** RPKM abundance of the major efflux pump genes in PA154197 and PAO1 calculated from the  
726 RNA-Seq data. **B.** RT-qPCR analysis of the expression of selective efflux genes and other genes  
727 associated with resistance to specific classes of antibiotics. **C.** Efflux activities of PA154197 and  
728 PAO1 measured by ethidium bromide accumulation. Higher fluorescence indicates lower efflux  
729 activity.

730 **Figure 5.** Virulence and production of several virulence factors in PA154197 and PAO1. **A.**

731 Pyocyanin production in PA154197 and PAO1 cells cultured in both LB broth and agar. **B.**

732 Pyoverdine production examined under UV light. **C.** Biofilm formation examined by the crystal

733 violet stain. **D.** Swimming and swarming motilities examined in the corresponding specific agar

734 plates. **E.** Virulence of PA154197 and PAO1 measured in a *C. elegans* infection model. N2 *C.*

735 *elegans* grown to L4 stage adults were infected with PA154197 or PAO1 for 24hrs. Survival of *C.*

736 *elegans* were monitored under the light microscope and recorded.

737 **Figure 6.** Hyper-activation of the PQS quorum sensing system independent of the master system

738 Las and Rhl in PA154197. **A.** Schematic diagram of the three quorum sensing systems in *P.*

739 *aeruginosa*, Las, Rhl, and PQS, and their selective regulon. Relative expression of the genes in the

740 Las, Rhl, and PQS regulon is depicted in color scheme with the genes expressed at a lower level

741 in PA154197 than in PAO1 in red color and those expressed at a higher level in PA154197 than



742 in PAO1 in blue color. RPKM abundance of the genes calculated from the RNA-Seq data are  
743 indicated. **B.** RT-qPCR of selective genes belonging to the Las, Rhl, and Pqs regulon, respectively.

744 **Figure 7.** Schematic model to show the pathoadaptation mechanism adopted by PA154197 to  
745 modulate its antibiotic resistance and virulence. In the high virulent, susceptible strains, the three  
746 quorum sensing (QS) systems Las, Rhl, and Pqs mediate the production of a variety of virulence  
747 factors and a high virulence in the cell. Antibiotic resistant strains with acquired resistance  
748 determinants often carry mutations in the master QS regulator Las to downregulate the QS system  
749 and virulence. Strains with pathoadaptive strategy such as PA154197 uncouple the activation of  
750 the secondary QS system Pqs from Las and Rhl to maintain an uncompromised virulence with  
751 simultaneous production of its resistance traits.

752

753 Table 1 The genomic features of *P. aeruginosa* PA154197.

754

| Features | Length<br>(bp) | % GC<br>content | Genes | Proteins | rRNA | tRNA | ncRNA | Pseudo<br>genes | CRISPR<br>arrays |
|----------|----------------|-----------------|-------|----------|------|------|-------|-----------------|------------------|
| PA154197 | 6,445,239      | 66.4%           | 5,923 | 5,816    | 12   | 65   | 4     | 26              | 3                |

755

756

757 Table 2. Mutational changes of genes conferring antibiotic resistance and their expression levels in  
 758 PA154197 relative to that in PAO1.

759

| Genes       | Non-synonymous/Indel mutations in encoding region                                  | Log2FoldChange (PA154197/PAO1) |
|-------------|------------------------------------------------------------------------------------|--------------------------------|
| <i>mexS</i> | D249-N                                                                             | 1.38                           |
| <i>mexT</i> | Del (8bp:237-244),F172-I,G301-C                                                    | 0.60                           |
| <i>mexE</i> | N/A                                                                                | 6.93                           |
| <i>mexF</i> | N/A                                                                                | 6.61                           |
| <i>oprN</i> | N/A                                                                                | 6.69                           |
| <i>mexG</i> | N/A                                                                                | 3.65                           |
| <i>mexH</i> | N/A                                                                                | 3.80                           |
| <i>mexI</i> | A782-E, A936-T                                                                     | 3.87                           |
| <i>opmD</i> | N/A                                                                                | 3.77                           |
| <i>armR</i> | S21-T,Y32-C                                                                        |                                |
| <i>mexR</i> | E76-*                                                                              | 2.54                           |
| <i>mexA</i> | N/A                                                                                | 3.47                           |
| <i>mexB</i> | I1001-T                                                                            | 3.52                           |
| <i>oprM</i> | N/A                                                                                | 3.44                           |
| <i>mexX</i> | Q4-H,K329-Q,L331V,W358-R                                                           | -                              |
| <i>mexY</i> | T543-A,L984-F                                                                      | -                              |
| <i>mexZ</i> | N/A                                                                                | -                              |
| <i>mexC</i> | P57-S,R76-Q,H310-R,S330-A,A378-T,P383-S,A384-V                                     | 2.05                           |
| <i>mexD</i> | T87-S,A155-T,E257-Q,E314-D,V434-A,N669-D,S685-G,I703-V,S845-A,S915-A,I982-V,K1031- | 0.72                           |

|             |                                                                                                                                                                                         |       |
|-------------|-----------------------------------------------------------------------------------------------------------------------------------------------------------------------------------------|-------|
|             | R,S1040-T                                                                                                                                                                               |       |
| <i>oprJ</i> | T376-S,K413-M                                                                                                                                                                           | -     |
| <i>mexJ</i> | F13-L,A314-P                                                                                                                                                                            | 2.86  |
| <i>mexK</i> | I21-L,K694-R,A841-T                                                                                                                                                                     | 3.16  |
| <i>mexL</i> | S4-P                                                                                                                                                                                    | 0.97  |
| <i>muxA</i> | T261-A                                                                                                                                                                                  | -     |
| <i>muxB</i> | N/A                                                                                                                                                                                     | -     |
| <i>muxC</i> | N/A                                                                                                                                                                                     | -     |
| <i>opmB</i> | N/A                                                                                                                                                                                     | -     |
| <i>mexP</i> | N/A                                                                                                                                                                                     | 1.03  |
| <i>mexQ</i> | I294-V,V384-I,G505-D,V517-A,R656-K,D722-E                                                                                                                                               | -     |
| <i>opmE</i> | S46-G,I50-V,S175-T,W354-R                                                                                                                                                               | -     |
| <i>oprD</i> | D43-N,S57-E,S59-R,E202-Q,I210-A,E230-K,S240-T,N262-T,A267-S,A281-G,K296-Q,Q301-E,R310-G,V359-L,Del(6bp:1132-1137),M372-V,S373-D,D374-S,N375-S,N376-S,V377-S,K380-Y,N381-A,Y382-G,G383-L |       |
| <i>ampC</i> | T105-A                                                                                                                                                                                  | -0.88 |
| <i>ampR</i> | N/A                                                                                                                                                                                     | -     |
| <i>gyrA</i> | T83-I, Del(6bp:2734-2739)                                                                                                                                                               | -     |
| <i>gyrB</i> | N/A                                                                                                                                                                                     | -     |
| <i>parC</i> | N/A                                                                                                                                                                                     | -     |
| <i>parE</i> | N/A                                                                                                                                                                                     | 0.84  |
| <i>parS</i> | H398R                                                                                                                                                                                   | 0.64  |
| <i>parR</i> | N/A                                                                                                                                                                                     | 0.61  |

|              |                      |       |
|--------------|----------------------|-------|
| <i>mvaT</i>  | N/A                  | -0.48 |
| <i>poxB</i>  | N/A                  | -2.55 |
| <i>nalC</i>  | G71-E,E153-Q,S209-R  | 0.42  |
| <i>nalD</i>  | N/A                  | -     |
| <i>aph</i>   | A14-S                | -     |
| <i>amgS</i>  | I260-V,G288-D        | -     |
| <i>spuF</i>  | P276-S               | -     |
| <i>fusA1</i> | I186-V               | 0.89  |
| <i>fusA2</i> | S176-A,A690-S,G695-A | -2.78 |

---

760 Notes: N/A, no non-synonymous mutation occurred; Ins: insertion; Del: deletion; “-” indicates not  
761 significant difference. “\*”: stop codon.

762

763 **Figures:**

764 **Figure 1.**

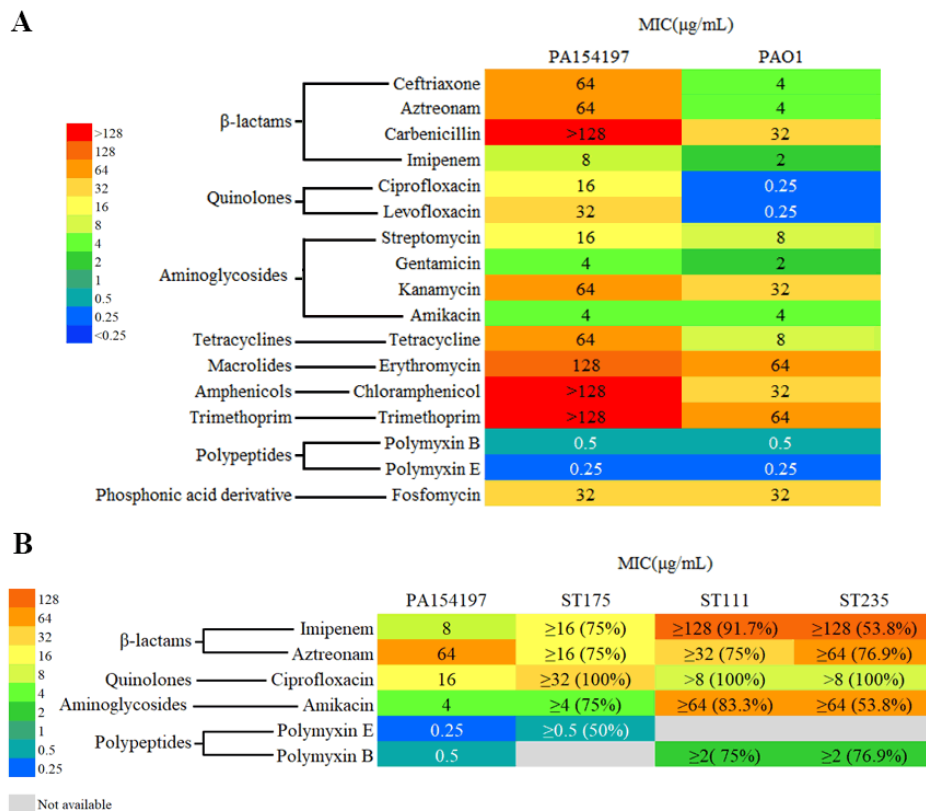

765

766

767 **Figure 2.**

**A**

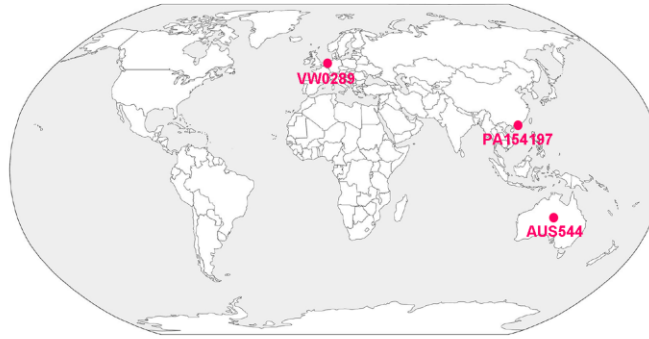

**B**

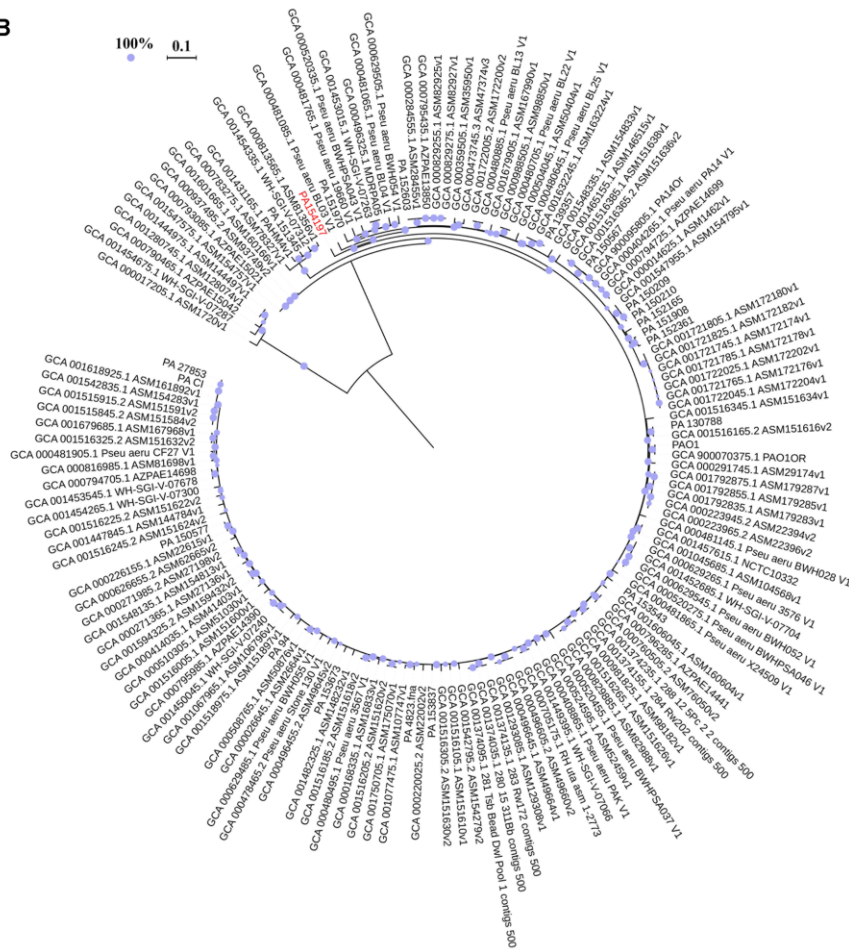

768

769





773 **Figure 4.**

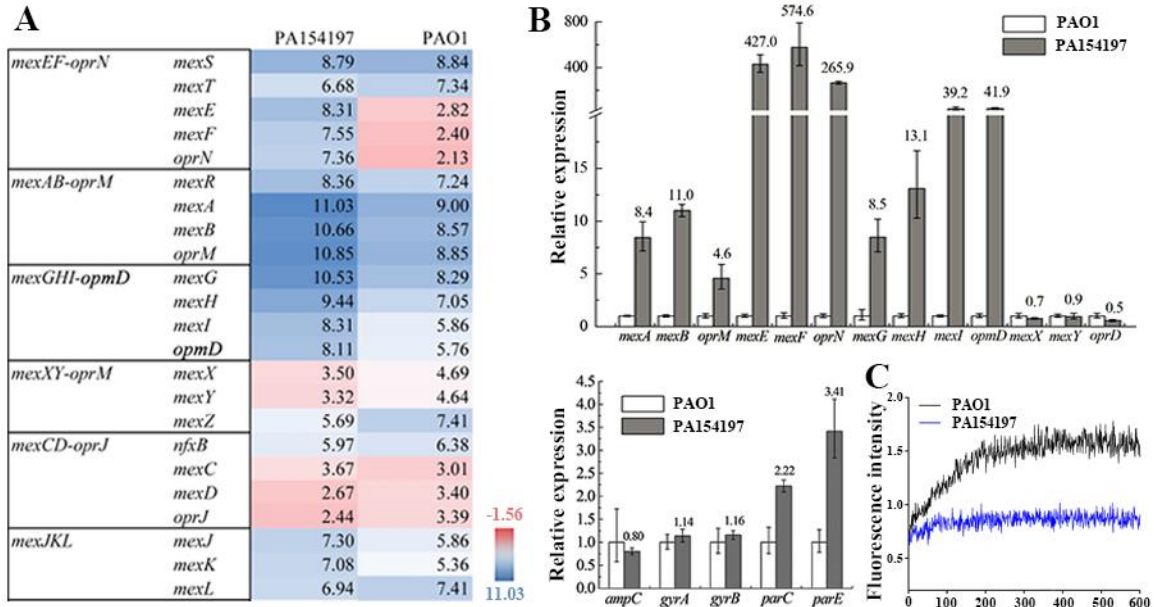

774

775

776 **Figure 5.**

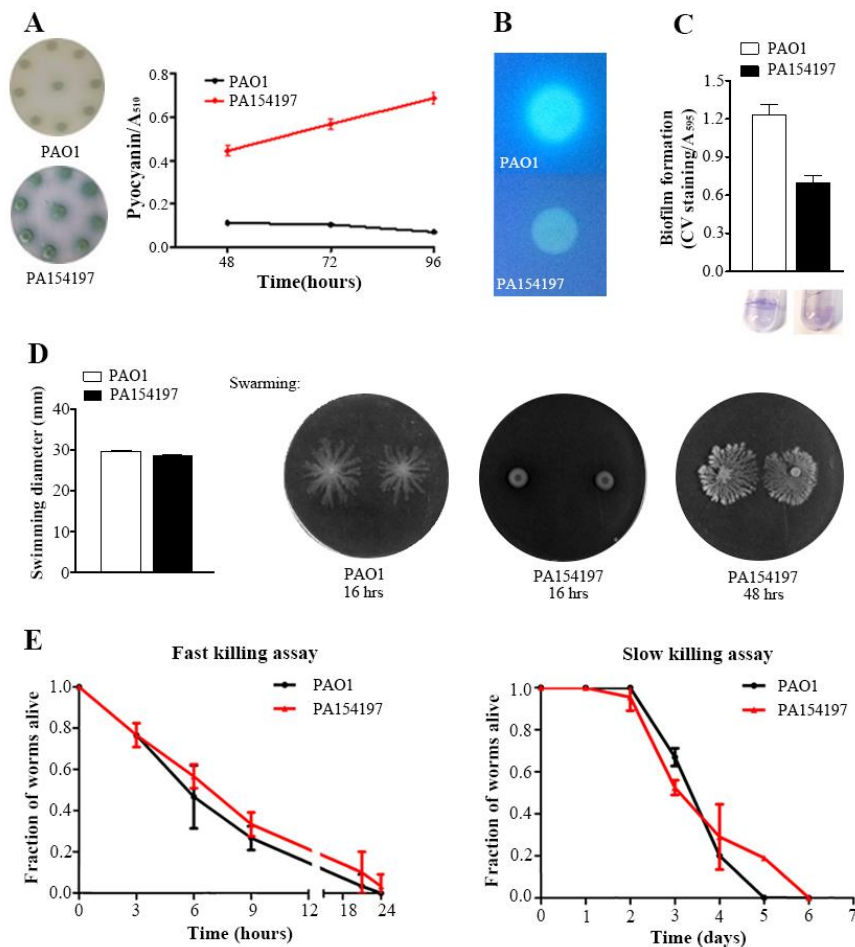

777

778

779

780 **Figure 6.**

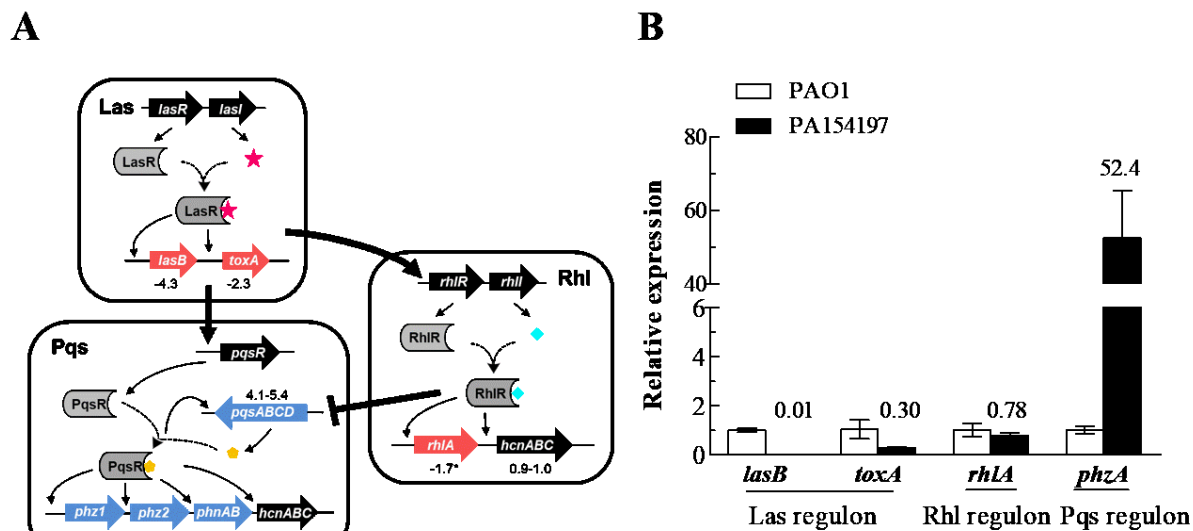

781

782

783 **Figure 7.**

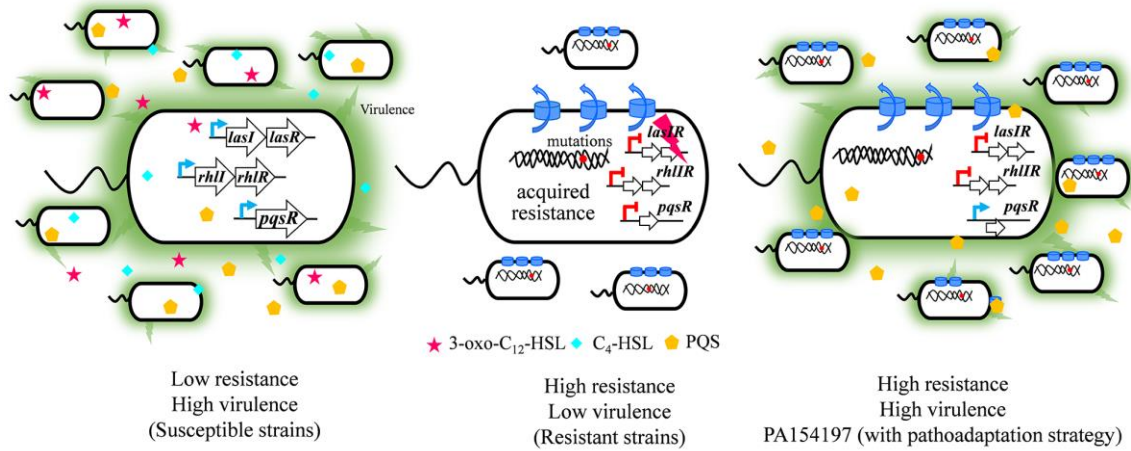

784
